# Supplementary material for: Assessment of Forest Fire Rating Systems in Typical Mediterranean Forest, Crete, Greece
Source: Copernicus journal article supplement (doi:10.5194/nhess-2017-318), 2017-10-09
Supplement: Supplementary file [file nhess-2017-318-SC1-supplement.pdf]

Dear Author,

I have some questions about your investigation. First, in my opinion, if you will give more information about the vegetation of the study region it will be better. It was used 4 annual plants for this work. Is there any reasons for selected this plants except their root types? Additionally, there are a few corrections below.

Yours Sincerely,

Dr. Nese YILMAZ

**COMMENTS:**

✓ There are a few typographical errors in the text which needs correcting. They are as follows:

1. In page 1, line 13 please correct the (DMC to (DMC).
2. In page 7, line 150 please correct the by (Murray et al. 2012) as Murray et al. 2012.

✓ In some equations, you need to explain this comments as follows:

1. In page 8, line 165, please explain what symbolizes the “W” and “F”. in Eq.4.
